# Supplementary material for: Evaluation of Antibiotic Biodegradation by a Versatile and Highly Active Recombinant Laccase from the Thermoalkaliphilic Bacterium Bacillus sp. FNT
Source: MDPI journal article supplement (doi:10.3390/biom14030369), 2024-03-19
Supplement: s1 [file s1]

## Supplementary Materials

# Evaluation of Antibiotic Biodegradation by a Versatile and Highly Active Recombinant Laccase from the Thermoalkaliphilic Bacterium *Bacillus* sp. FNT

Jorge Sánchez-SanMartín<sup>2</sup>, Sebastián L. Márquez<sup>2</sup>, Giannina Espina<sup>2\*</sup>, Rodrigo Cortés-Antiquera<sup>1</sup>, Junsong Sun<sup>3</sup>  
Jenny M. Blamey<sup>1,2\*</sup>

<sup>1</sup> Facultad de Química y Biología, Universidad de Santiago de Chile, Alameda 3363, Santiago 9170022, Chile.

<sup>2</sup> Fundación Biociencia, José Domingo Cañas 2280, Santiago 7750132, Chile.

<sup>3</sup> Green Chemical Engineering Technology R&D Center, Shanghai Advanced Research Institute, Chinese Academy of Sciences, Haik Road 99, Shanghai 201210, China.

\* Correspondence: jblamey@bioscience.cl (J.M.B); gespina@bioscience.cl (G.E)

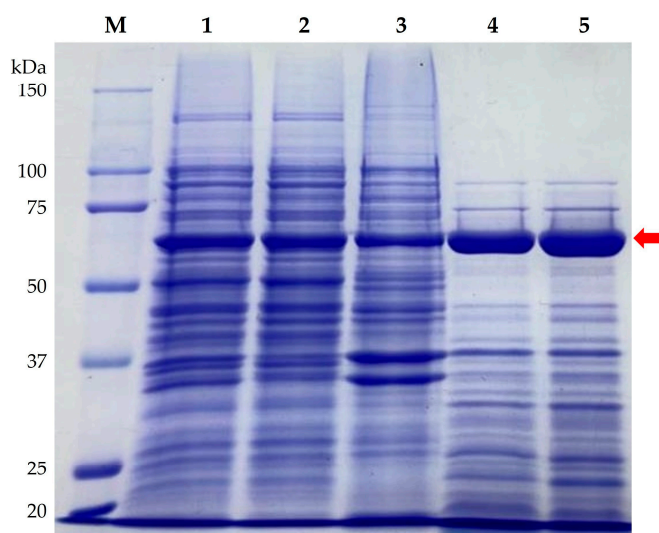

**Figure S1.** Electrophoretic analysis of the heterologous overexpression and partial purification of FNTL. Lane M: Molecular weight marker (Biorad Precision Plus Protein™ Kaleidoscope™ pre-stained protein standard). Lane 1: *E. coli* BL21 lysate (total fraction); Lane 2: inclusion bodies solubilized with 8 M urea (insoluble fraction); Lane 3: cell-free extract (soluble fraction); Lane 4: partial purification by heat treatment at 85°C for 5 min. Lane 5: concentrated partially purified FNTL. The protein concentration loaded in each well is 15 µg and the band corresponding to FNTL is highlighted by a red arrow

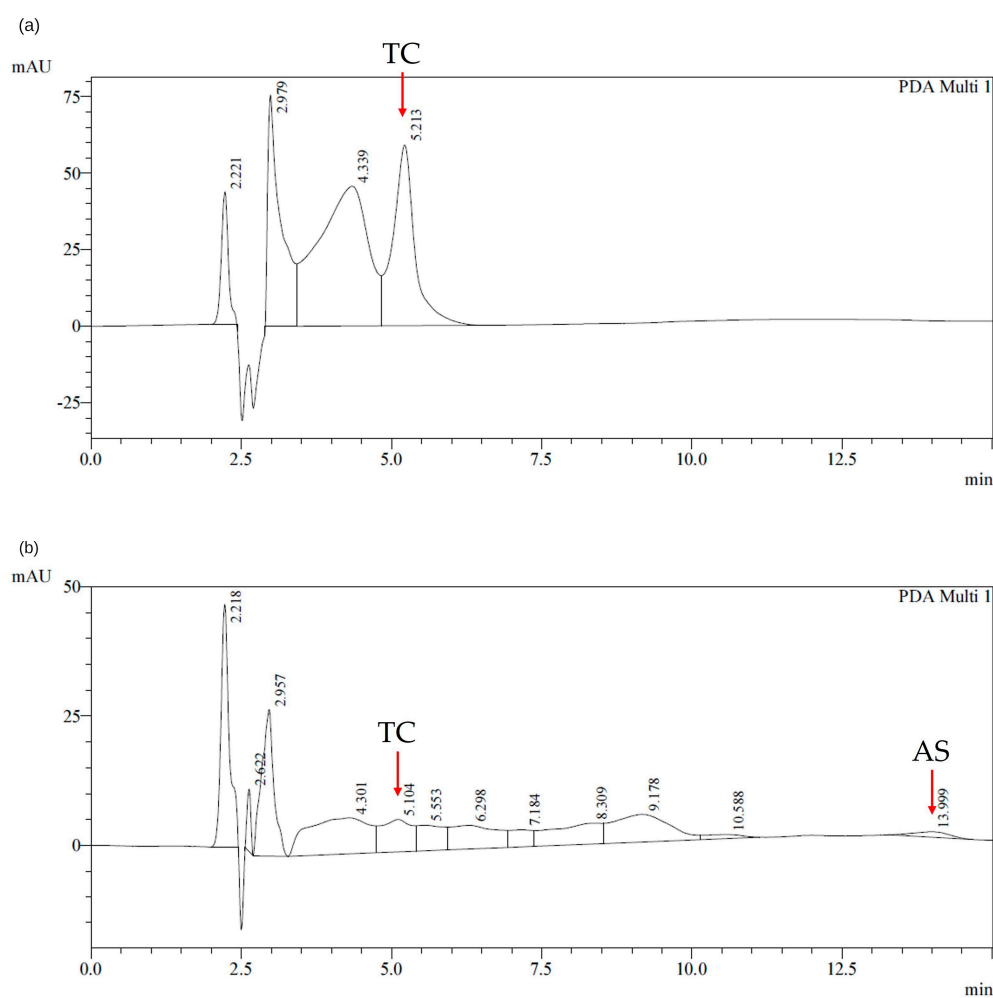

**Figure S2.** Chromatograms of tetracycline separation by reversed phase HPLC. **(a)** Chromatogram obtained from control tetracycline incubated at pH 6.0, 20°C for 24 h. **(b)** Chromatogram obtained from tetracycline incubated with FNTL and AS at pH 6.0, 20°C for 24 h.

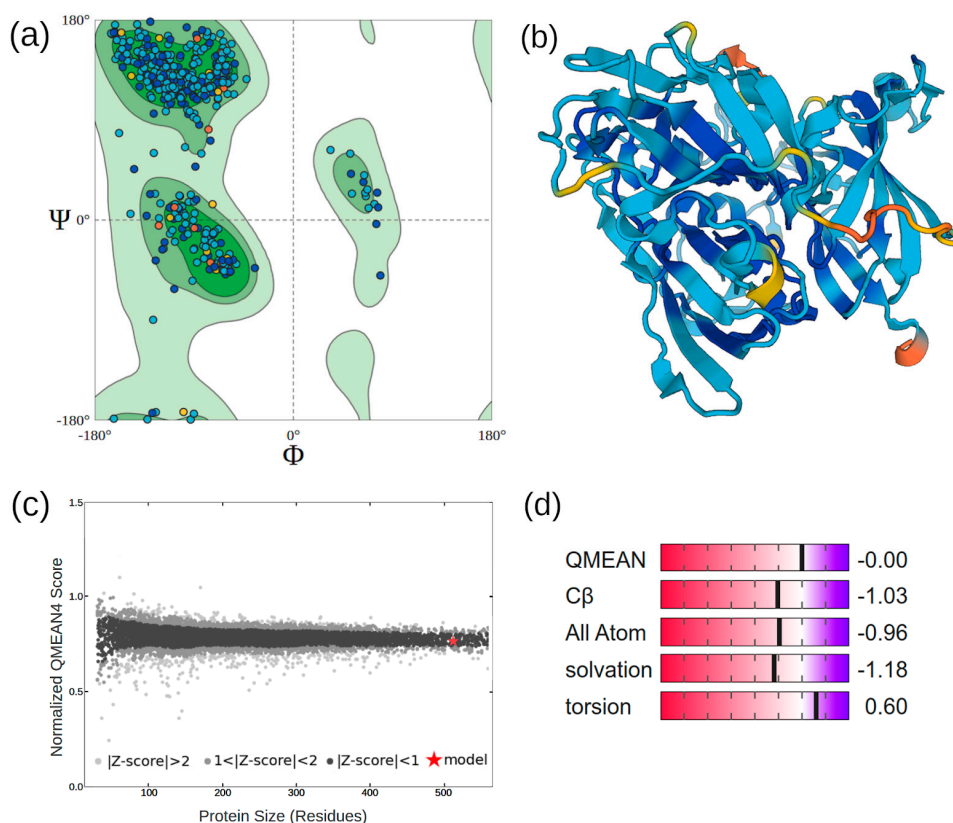

**Figure S3.** Quality assessment of the 3D model of FNTL inferred by homology with SWISS-MODEL. **(a)** Ramachandran plot of the conformational space of the three-dimensional model; **(b)** illustrating the distribution of phi ( $\varphi$ ) and psi ( $\psi$ ) angles for amino acid residues in energetically allowed and forbidden regions, and **(c)** comparison with non-redundant sets of PDB structures based on QMEAN4 scores. **(d)** Geometric evaluators of the model (C $\beta$  interaction, all-atom interaction, solvation, torsion). Ramachandran plots were generated using RamachanDraw; Z-score-transformed QMEAN4 score plots were generated using the Swiss-Model server.

**Table S1. Quality scores of FNTL three-dimensional models generated with SWISS-MODEL.** ERRAT score: percentage of the protein residues whose error value falls below the 95% rejection cutoff; Verify 3D score: percentage of residues with averaged 3D-1D score  $\geq 0.1$ ; Prosa Z-score and QMEANDisCo scores represent overall model quality. MolProbity-score represents the crystallographic resolution at which the observed quality values would be expected. Model 1 and Model 2 correspond to the models built using as templates A0A6I7FGV2 and 1GSK, respectively.

| Validation tool |               | Swiss-Model's FNTL models |         |
|-----------------|---------------|---------------------------|---------|
|                 | Scoring range | Model 1                   | Model 2 |
| ERRAT (%)       | [0–100]       | 89.33                     | 87.29   |
| Verify 3D (%)   | [0–100]       | 86.35                     | 85.85   |
| Prosa           | [–]           | -7.88                     | -7.98   |
| MolProbity (Å)  | [0–99]        | 1.03                      | 1.40    |
| QMEANDisCo      | [0–1]         | 0.85                      | 0.87    |
